# Supplementary material for: Surgically Resected Cardiac Angiosarcoma: Survival Analysis from the National Cancer Database
Source: MDPI journal article supplement (doi:10.3390/jcm12247764), 2023-12-18

**Figure S1:** CONSORT flowchart of our included cohort

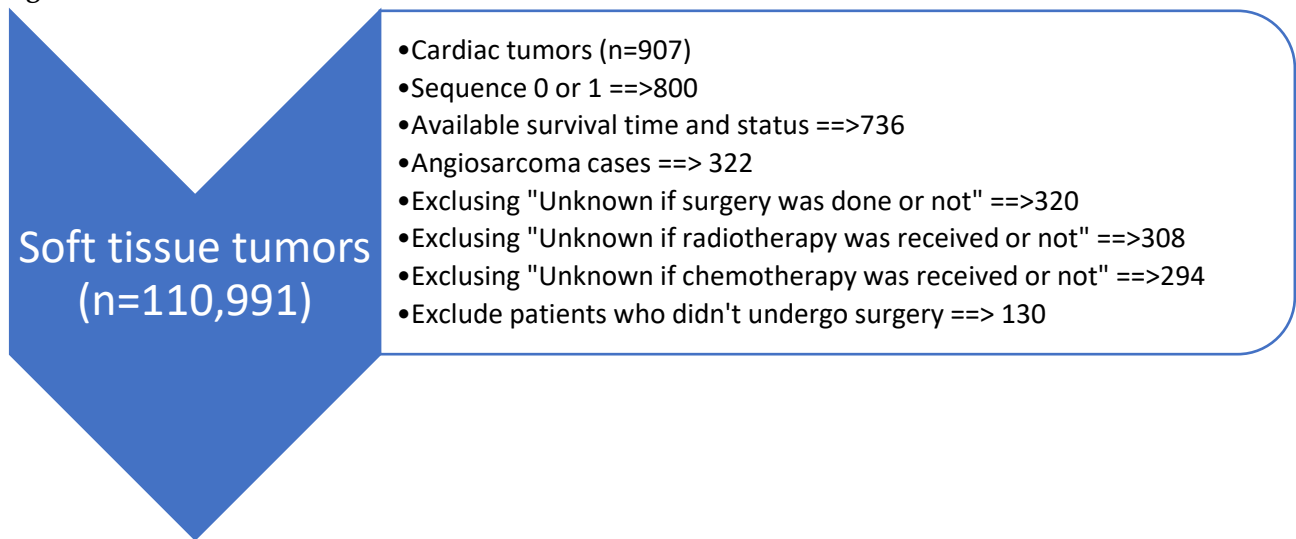

Figure S2: Kaplan Meier curves for the death from any cause for age > 57 and age <57

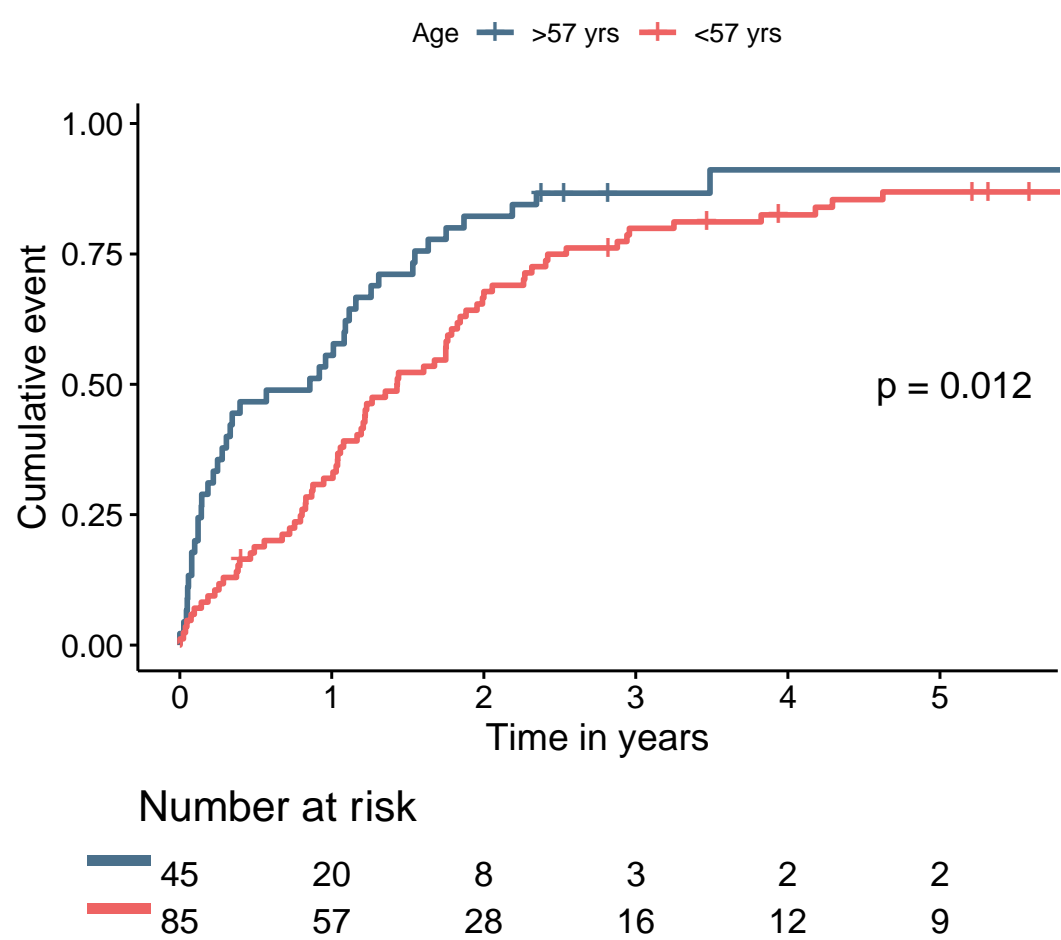

Supplement: s1 [file s1]
